# Supplementary material for: Opposite macroevolutionary responses to environmental changes in grasses and insects during the Neogene grassland expansion
Source: PubMed Central journal article supplement (PMC6269479; doi:10.1038/s41467-018-07537-8), 2018-11-30
Supplement: 41467_2018_7537_MOESM2_ESM.pdf [file 41467_2018_7537_MOESM2_ESM.pdf]

## **Description of Additional Supplementary Files**

File Name: Supplementary Data 1

Description: GenBank accession numbers.

File Name: Supplementary Data 2

Description: Known host-plant associations and ecological preferences for the sampled Sesamiina species.

File Name: Supplementary Data 3

Description: Coding of the panicoid species ranges for the historical biogeography analyses.
